# Supplementary material
Source: PubMed Central journal article supplement (PMC4457508)
Supplement: NIHMS590498-supplement-Supplementary_Info.pdf [file NIHMS590498-supplement-Supplementary_Info.pdf]

## Supplementary Tables

**Supplementary Table 1. Top Ten Upregulated Genes by Microarray Analysis of Mouse Kidney FAF Normalized to Mouse Kidney NF**

| <b>GENES</b> | <b>FOLD</b> | <b>GENE DESCRIPTION</b>                       |
|--------------|-------------|-----------------------------------------------|
| Wfdc2        | 37.21       | Human Epididymis Protein 4 (HE4)              |
| Bgn          | 32.92       | Biglycan                                      |
| Des          | 26.68       | Desmin                                        |
| Serpinf1     | 20.83       | Serpin peptidase inhibitor, clade F, member 1 |
| Dcn          | 19.75       | Decorin                                       |
| Actg2        | 16.53       | Actin, gamma2, smooth muscle, enteric         |
| Emp1         | 16.01       | Epithelial membrane protein 1                 |
| Serpina10    | 14.44       | Serpin peptidase inhibitor, clad A, member 10 |
| Igfbp6       | 14.37       | Insulin-like growth factor binding protein 6  |
| Ptgis        | 14.32       | Prostaglandin I2 (prostacyclin) synthase      |

**Supplementary Table 2. Patient Information**

| Sera from:<br>(F: female<br>M: male) | Interstitial<br>Fibrosis<br>(%) | Age<br>(years) | Other Renal<br>Pathology                                                 | Other Medical<br>History                                   | BUN<br>(mg/dL) | Albumin to<br>Creatinine<br>Ratio |
|--------------------------------------|---------------------------------|----------------|--------------------------------------------------------------------------|------------------------------------------------------------|----------------|-----------------------------------|
| Patient 1<br>(M)                     | 20                              | 75             | Secondary FSGS                                                           | Monoclonal<br>gammopathy,<br>bladder cancer                | 22             | 296                               |
| Patient 2 (F)                        | 20                              | 74             | Fibrillary GN                                                            | Breast cancer,<br>obesity                                  | 30             | 46.3                              |
| Patient 3 (F)                        | 20                              | 56             | Secondary FSGS,<br>thin basement<br>membranes                            |                                                            | 26             | 288.2                             |
| Patient 4<br>(M)                     | 20                              | 29             | IgA nephropathy<br>and interstitial<br>nephritis                         |                                                            | 33             |                                   |
| Patient 5 (F)                        | 30                              | 59             | Secondary FSGS,<br>thrombotic<br>angiopathy                              | Glucose<br>intolerance,<br>obesity                         | 27             | 1799.4                            |
| Patient 6 (F)                        | 60                              | 56             | Acute interstitial<br>nephritis                                          |                                                            | 19             | 3.5                               |
| Patient 7<br>(M)                     | 60                              | 58             | Diabetic nodular<br>sclerosis (early),<br>phosphate<br>nephropathy       |                                                            | 26             | 61.3                              |
| Patient 8<br>(M)                     | 40                              | 59             | Secondary FSGS                                                           |                                                            | 32             | 188.2                             |
| Patient 9<br>(M)                     | 60                              | 69             | Chronic interstitial<br>nephritis, immune<br>complex GN                  | Bacteremia,<br>colitis                                     | 38             | 428.4                             |
| Patient 10<br>(F)                    | 20                              | 55             | IgA nephropathy,<br>thin basement<br>membrane,<br>interstitial nephritis | Pernicious<br>anemia,<br>thyroiditis                       | 36             | NA                                |
| Patient 11<br>(F)                    | 60                              | 54             | Secondary FSGS,<br>vascular sclerosis                                    | Pericarditis                                               | 35             | NA                                |
| Control 1 (F)                        | NA                              | 34             | NA                                                                       | Endometriosis                                              | 17             | 35.8                              |
| Control 2 (F)                        | NA                              | 33             | NA                                                                       | Endometriosis                                              | 14             |                                   |
| Control 3 (F)                        | NA                              | 58             | NA                                                                       | Cerebrovascular<br>disease,<br>lumpectomy,<br>hysterectomy | 17             | NA                                |
| Control 4<br>(M)                     | NA                              | 55             | NA                                                                       | Mitral<br>regurgitation                                    | 18             | NA                                |
| Control 5 (F)                        | NA                              | 55             | NA                                                                       | Liver<br>hemangiomas                                       | 15             | NA                                |

## Supplementary Material and Methods

### Generation of $\alpha$ SMA-RFP transgenic mice

$\alpha$ SMA-RFP mice were generated using an extended  $\alpha$ SMA promoter containing approximately 2.4kb of the  $\alpha$ SMA promoter plus exon 1, intron 1, and part of exon 2 (altogether 5.2kb) amplified with the following primers: 5' CAATGCATGCTGTACAAACATCAGG 3' (Forward); 5' AGCTGGAGCAGCGTCTCAGGGTTCTGC 3' (Reverse). The extended  $\alpha$ SMA promoter was cloned into the pDsRed-Express-1 vector (Clontech) using EcoRI and Sall restriction sites, and the whole  $\alpha$ SMA-RFP construct was released from the vector using EcoRI and DrdI before purification and injection into fertilized eggs. All transgenic mice were created in the Brigham and Women's Hospital Transgenic Core Facility on a FVB background and backcrossed at least 10 generations to a BALB/c background for experiments. Mouse studies followed the Institutional Animal Care and Use Guidelines at the BIDMC. Age-matched mice were used for all studies.

### 5/6 Nephrectomy

CD-1 mice were subjected to 5/6 nephrectomy as previously described<sup>1</sup>. Two weeks following completion of surgery, the mice were treated with anti-IgG (n=3) and anti-HE4 (n=3). 14mg/Kg BW of rabbit anti-HE4 antibody or rabbit IgG control antibody was administered i.p. every other day for two weeks. The mice were then euthanized and kidney histology assessed.

### Microarray analysis and gene expression analyses

Total RNA was isolated from mouse fibroblasts using RNeasy Plus Mini Kit (Qiagen) and submitted to the Molecular Genetics Core Facility at Children's Hospital (Boston, MA). Microarray analysis was performed using Mouse Ref8 Gene Expression BeadChip (Illumina), and gene expression was determined by MetaCore (GeneGo) and Genome Studio (Illumina) software. For gene expression analysis by Real time PCR, the following primers were used:

|                               |                                                            |
|-------------------------------|------------------------------------------------------------|
| Mouse Col1a1                  | 5'-GCTCCTCTTAGGGGCCACT-3'<br>5'-CCACGTCTCACCATTGGGG-3'     |
| Mouse HE4                     | 5'-AACCAATTACGGACTGTGTGTT-3'<br>5'-TCGCTCGGTCCATTAGGCT-3'  |
| Mouse Prss23                  | 5'-GGCAGACTTCGACGCCAAA-3'<br>5'-TGTTCCCTTGTGACACTGAGG-3'   |
| Mouse Prss35                  | 5'-TCTCTGATGGGTCGGAACAG-3'<br>5'-ACTCACAACCTGGGGTATTCT-3'  |
| Mouse Acta2                   | 5'-CCAGTTGTACGTCCAGAGGC-3'<br>5'-GGTGATGATGTCCCAGGGC-3'    |
| Mouse $\beta$ -actin          | 5'-GGCTGTATTCCCCTCCATCG-3'<br>5'-CCAGTTGGTAACAATGCCATGT-3' |
| Human HE4                     | 5'-CGACAACCTCAAGTGCTGC-3'<br>5'-AGAAATCTCCCAGAGCCTCC-3'    |
| Human PRSS23                  | 5'-CAGTGCATAAGGGAACTCCAC-3'<br>5'-CCTGAGTCTCGGTGTTGGG-3'   |
| Human PRSS35                  | 5'-CATCGAATGCCAGAAAGAACTCC-3'<br>5'-GGTTAAGGTTCCGGTGCCA-3' |
| Human $\beta$ 2-microglobulin | 5'-CCAGCAGAGAATGGAAAGTC-3'<br>5'-GATGCTGCTTACATGTCTCG-3'   |

### **Migration and proliferation assays**

Mouse FAFs were assessed for migration in Boyden chambers as previously described<sup>2</sup> and proliferation using MTT assay under standard condition using DMSO as solubilizing agent.

## Supplementary Figures

## Supplementary Figure 1

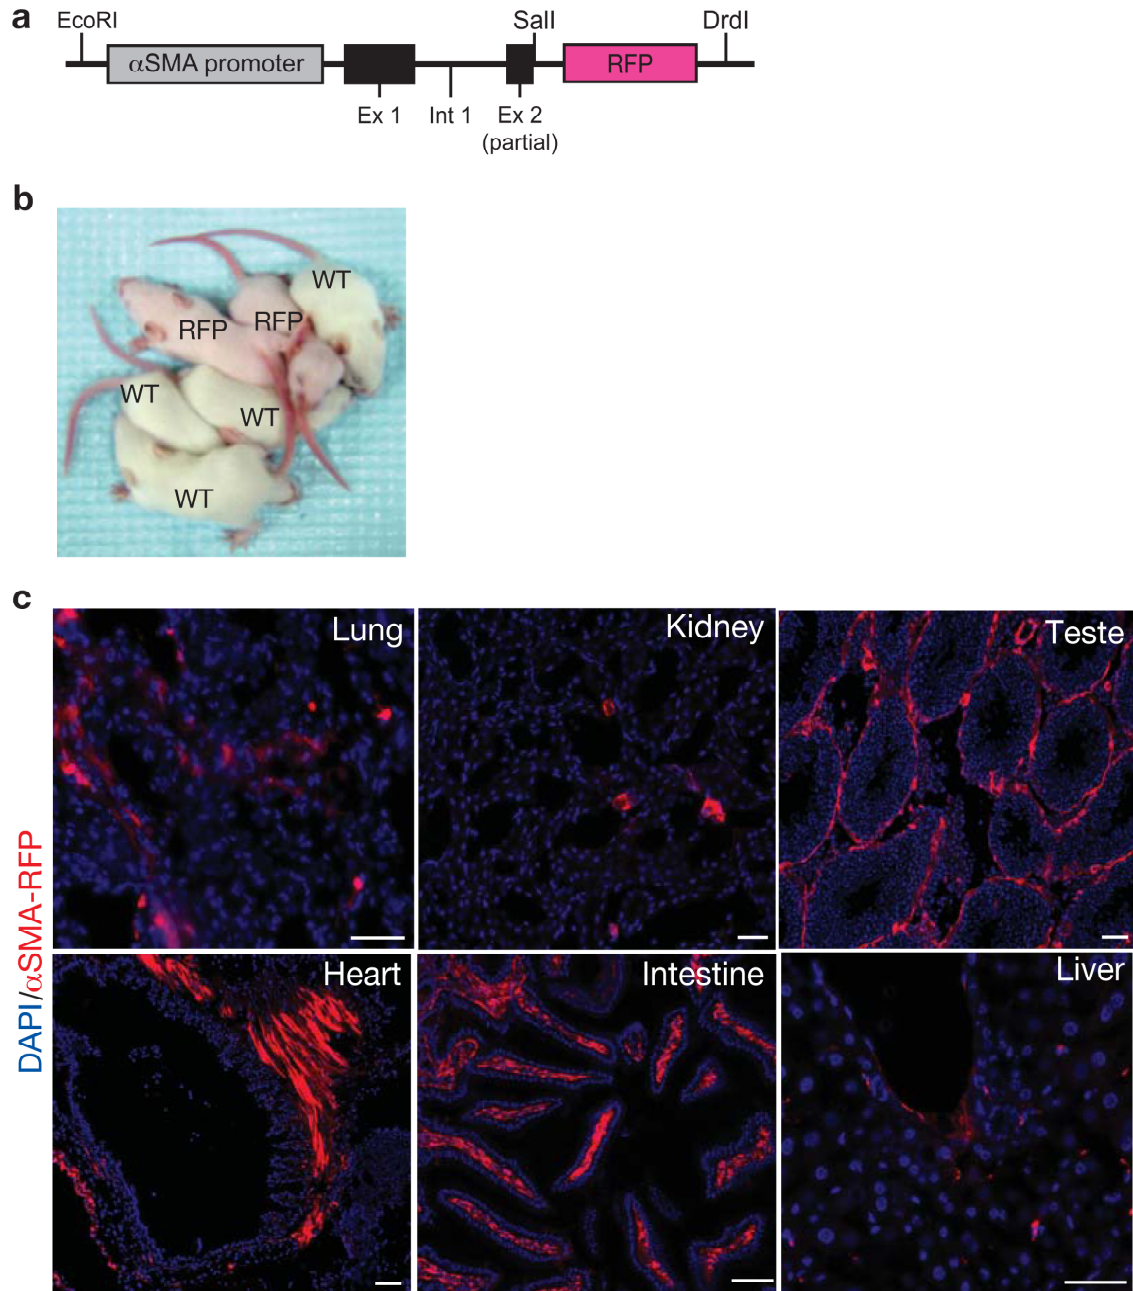Supplementary Figure 1. Characterization of  $\alpha$ SMA-RFP transgenic mice.

a. Construct map of the  $\alpha$ SMA-RFP transgene injected into zygotes for the production

of transgenic mice. Ex: exon, Int: intron. **b.**  $\alpha$ SMA-RFP transgenic mice (RFP) express red fluorescent protein (dsRed) in  $\alpha$ SMA<sup>+</sup> cells, resulting in a demonstrably pink hue when compared to wild-type (WT) mice because  $\alpha$ SMA<sup>+</sup> cells within the hair follicle dermis cast a red tint. **c.**  $\alpha$ SMA-RFP<sup>+</sup> cells from lung, kidney, teste, heart, intestine and liver in  $\alpha$ SMA-RFP mice. DAPI (Blue): nuclei. Scale bar: 50 $\mu$ m.

## Supplementary Figure 2

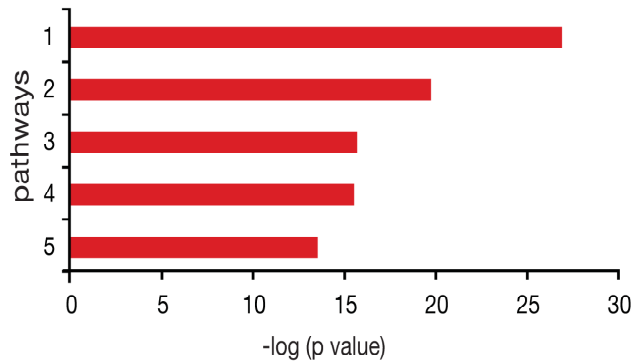

|                                                                                       | pValue           |
|---------------------------------------------------------------------------------------|------------------|
| <b>1. TGF mediated cytoskeleton remodeling</b> .....                                  | <b>1.222e-27</b> |
| MAPKKK cascade.....                                                                   | 3.149e-28        |
| Transforming growth factor beta receptor signaling pathway.....                       | 1.658e-22        |
| Positive regulation of mesenchymal cell proliferation.....                            | 4.994e-14        |
| <b>2. Cytoskeleton remodeling</b> .....                                               | <b>1.862e-20</b> |
| Cell migration.....                                                                   | 3.044e-17        |
| Cell-matrix adhesion.....                                                             | 4.325e-14        |
| Integrin-mediated signaling pathway.....                                              | 6.334e-13        |
| <b>3. Developmental regulation of epithelial-to-mesenchymal transition (EMT)</b> .... | <b>1.968e-16</b> |
| Wound healing.....                                                                    | 2.202e-23        |
| Positive regulation of cell division.....                                             | 2.584e-22        |
| Positive regulation of epithelial to mesenchymal transition.....                      | 3.443e-22        |
| <b>4. Cell adhesion</b> .....                                                         | <b>2.913e-16</b> |
| Caveola assembly.....                                                                 | 5.986e-11        |
| Negative regulation of fibrinolysis.....                                              | 1.074e-10        |
| Chemotaxis.....                                                                       | 1.696e-11        |
| <b>5. Transport of Clathrin-coated vesicle cycle</b> .....                            | <b>2.890e-14</b> |
| Clathrin coat assembly.....                                                           | 2.429e-21        |
| Vesicle-mediated transport.....                                                       | 2.185e-92        |
| Cellular membrane organization.....                                                   | 1.682e-22        |

**Supplementary Figure 2. Pathway analysis from microarray gene expression studies in mouse fibrosis-associated fibroblasts compared to normal fibroblasts.**

Pathways analysis from differential gene expression and p-values are depicted.



**Supplementary Figure 3**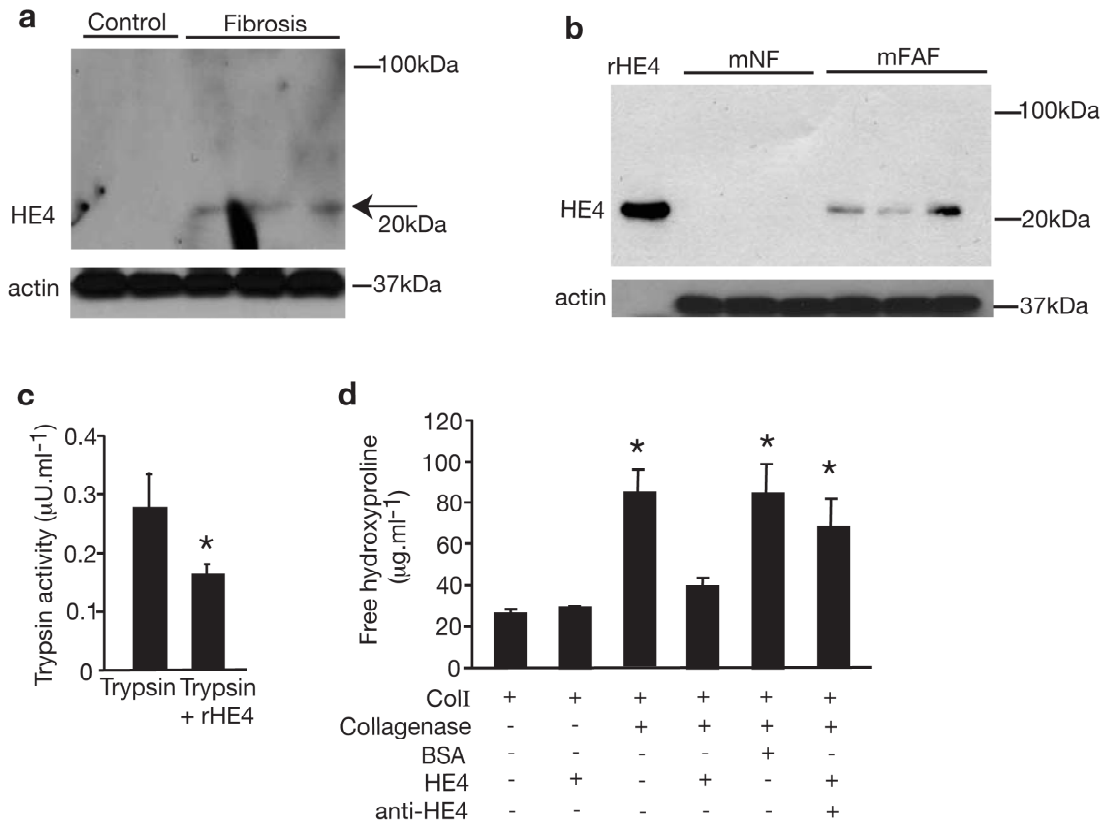**Supplementary Figure 3. HE4 inhibits collagenase activity.**

**a.** Western blot for HE4 in mouse control and fibrotic kidneys. Actin was used as an internal control. Arrow points to a single band for HE4 detection in fibrotic kidney lysates. **b.** Western blot for HE4 in mouse normal (mNF) and fibrosis associated fibroblasts (mFAF). Actin was used as an internal control. **c.** Trypsin activity assayed with and without recombinant HE4 protein (rHE4). **d.** Hydroxyproline release assay: free hydroxyproline ( $\mu\text{g}\cdot\text{ml}^{-1}$ ) from type I collagen digestion: type I collagen digested by bacterial collagenase with and without

HE4, with and without anti-HE4 antibody. Data shown as mean  $\pm$  sem.  
\* $p < 0.05$ .

#### Supplementary Figure 4

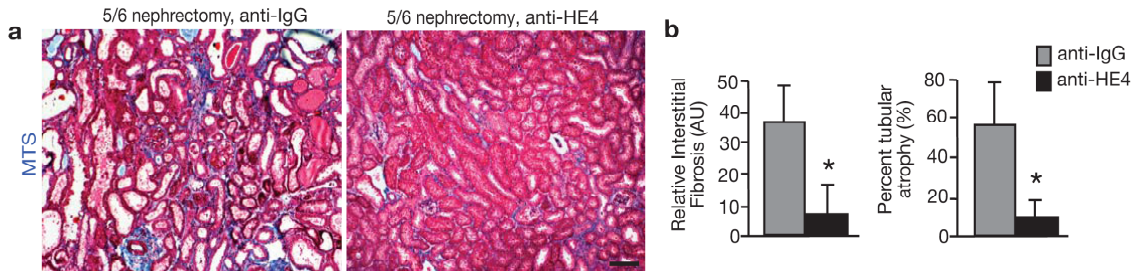

#### Supplementary figure 4. Anti-HE4 neutralizing antibody improves renal histology following 5/6 nephrectomy

a. Representative Masson Trichrome (MTS) of fibrotic kidneys from mice with 5/6 nephrectomy treated with anti-HE4 (n=3) or anti-IgG (n=3) antibody. Scale bar: 50 $\mu$ m. b. Morphometric analyses for relative interstitial fibrosis and tubular atrophy based on MTS staining shows reduced fibrosis and tubular atrophy in anti-HE4-treated mice. AU: Arbitrary Unit. Data shown as mean  $\pm$  sem.  
\* $p < 0.05$ .



**Supplementary Figure 5**

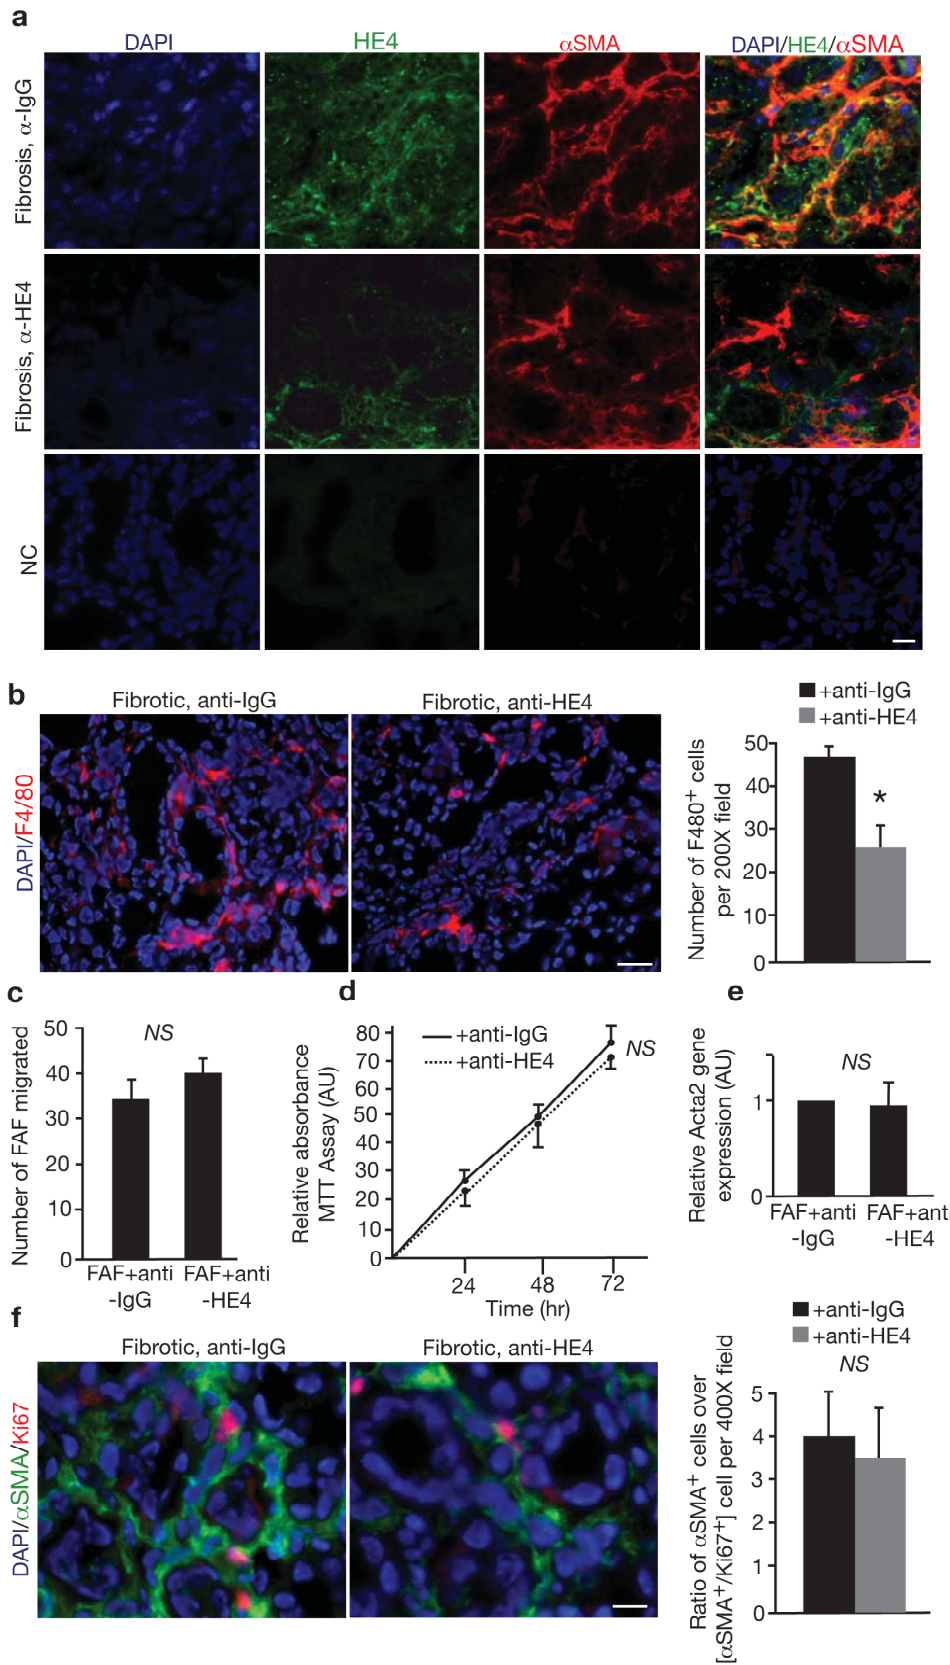

**Supplementary Figure 5. HE4 does not directly alter migration and proliferation of fibrosis-derived fibroblasts.**

**a.** Immunolabeling for HE4 and  $\alpha$ SMA in fibrotic kidneys from mice treated with anti-HE4 or anti-IgG control antibodies. DAPI (blue): nuclei. NC: Negative control, 2<sup>ry</sup> antibody only. Scale bar: 50 $\mu$ m. **b.** Immunolabeling for F4/80 (labeling macrophage) in fibrotic kidneys from mice treated with anti-HE4 or anti-IgG control antibodies. DAPI (Blue): nuclei. Scale bar: 50 $\mu$ m. Histogram represents the relative number of F4/80<sup>+</sup> cells per field of view at 200X magnification. **c.** FAF migration assay incubated with anti-IgG or anti-HE4. **d.** Relative absorbance for MTT assay (proliferation) of FAF incubated with anti-IgG or anti-HE4. **e.** Relative *Acta2* gene expression in mouse NFs and FAFs (normalized to NF set arbitrarily to 1). AU, arbitrary units. **f.** Immunolabeling for KI67 and  $\alpha$ SMA in fibrotic kidneys from mice with UUO and treated with anti-HE4 or anti-IgG control antibodies. DAPI (Blue): nuclei. Scale bar: 10 $\mu$ m. Histogram represents the relative number of  $\alpha$ SMA<sup>+</sup>/KI67<sup>+</sup> (double positive) cells per field of view at 400X magnification. Data shown as mean +/- sem. \*p<0.05, NS: not significant.

**Supplementary references:**

1. Leelahavanichkul, A.e.a. Rapid CKD progression in a new mouse kidney remnant model: strain dependent resistance is overcome by angiotensin II. *Kidney International* **78**, 1136-1153 (2010).
2. Zeisberg, M., Maeshima, Y., Mosterman, B. & Kalluri, R. Renal fibrosis. Extracellular matrix microenvironment regulates migratory behavior of activated tubular epithelial cells. *The American journal of pathology* **160**, 2001-2008 (2002).
